# Supplementary material for: Ligands affect the crystal structure and photovoltaic performance of thin films of PbSe quantum dots
Source: Royal Society of Chemistry journal article supplement (doi:10.1039/c0jm04417b), 2011-01-01

## Electronic Supplementary Information

### Ligands Affect the Lattice Structure and Photovoltaic Performance of Thin Films of PbSe Quantum Dots

*Chih-Yin Kuo,<sup>†</sup> Ming-Shin Su,<sup>†</sup> Ching-Shun Ku,<sup>‡</sup> Shu-Min Wang,<sup>†</sup> Hsin-Yi Lee,<sup>‡</sup> and Kung-Hwa Wer<sup>\*,†</sup>*

**Figure S1.** SEM images of PbSe QDs featuring various capping ligands. (A) OA-capped PbSe QD film; (B) OA-capped PbSe QD film subsequently treated with 1 mM EDT; (C) BA-exchanged PbSe QD film; (D) BA-exchanged PbSe QD film subsequently treated with 1 mM EDT. Scale bar: 100 nm.

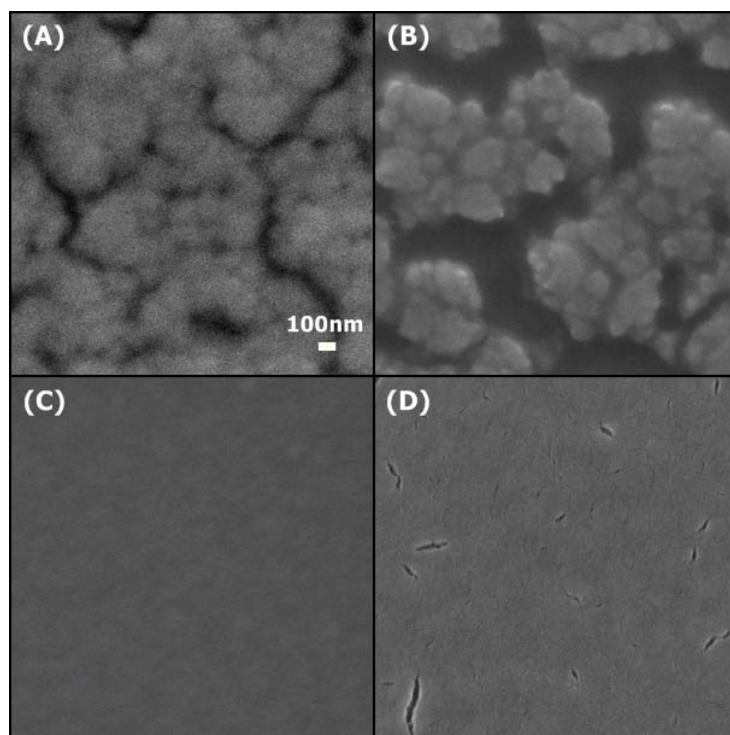

**Figure S2.** TEM image of monodisperse PbSe QDs with a first exciton absorption peak of 1455 nm.

Average diameter of QDs: 4.6 nm.

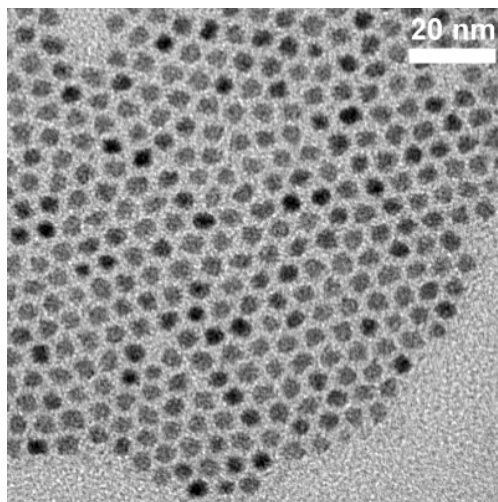

**Figure S3.** Synchrotron X-ray azimuthal scans of (i) OA-, (ii) BA-, and (iii) EDT-capped PbSe QD films, prepared through spin-coating onto Si substrates (log-normal scale).

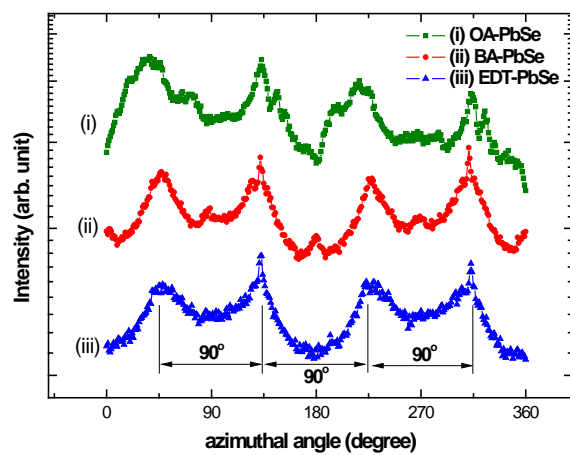

**Figure S4.** Synchrotron X-ray in-plane CTR and azimuthal scans of BA-capped PbSe QD films, prepared by spin-coating onto ITO/PEDOT:PSS and Si substrates.

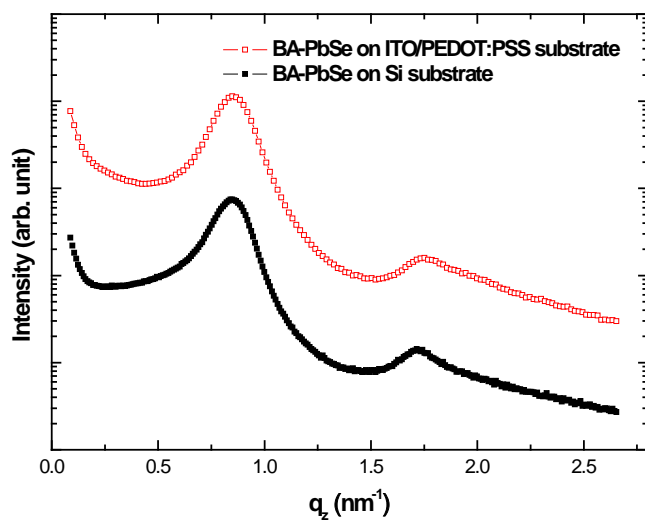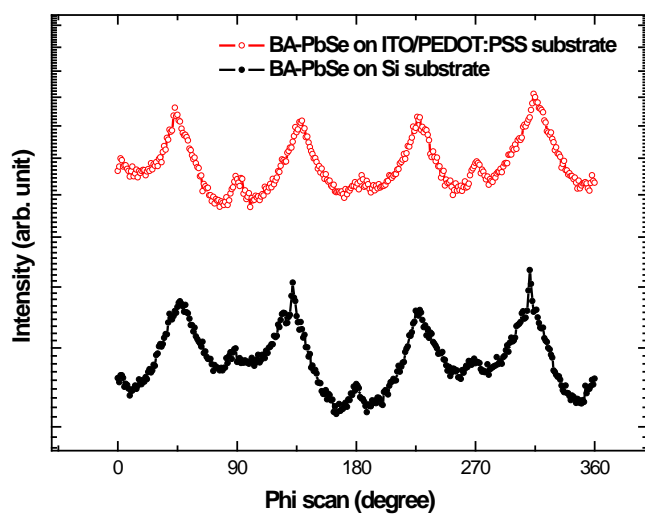

**Table S1.** Synchrotron XRR fitted parameters of the ligand-capped PbSe QD films.

| PbSe-OA sample; grain size: 71.8 nm  |                |                                           |                               |
|--------------------------------------|----------------|-------------------------------------------|-------------------------------|
| Layer                                | Thickness (nm) | Roughness (nm)                            | Density (g cm <sup>-3</sup> ) |
| Si substrate                         | N.A.           | $\sigma_{\text{Si/SiO}_2} = 0.1$          | 2.328                         |
| SiO <sub>2</sub>                     | 2.5            | $\sigma_{\text{SiO}_2/\text{OA}} = 0.3$   | 2.27                          |
| PbSe-OA film                         | 140            | $\sigma_s = 8$                            | 1.863                         |
| PbSe-BA sample; grain size: 31.8 nm  |                |                                           |                               |
| Layer                                | Thickness (nm) | Roughness (nm)                            | Density (g cm <sup>-3</sup> ) |
| Si substrate                         | N.A.           | $\sigma_{\text{Si/SiO}_2} = 0.1$          | 2.328                         |
| SiO <sub>2</sub>                     | 2.5            | $\sigma_{\text{SiO}_2/\text{OB}} = 0.3$   | 2.27                          |
| PbSe-BA film                         | 62             | $\sigma_s = 3.8$                          | 3.561                         |
| PbSe-EDT sample; grain size: 31.6 nm |                |                                           |                               |
| Layer                                | Thickness (nm) | Roughness (nm)                            | Density (g cm <sup>-3</sup> ) |
| Si substrate                         | N.A.           | $\sigma_{\text{Si/SiO}_2} = 0.1$          | 2.328                         |
| SiO <sub>2</sub>                     | 3.3            | $\sigma_{\text{SiO}_2/\text{EDT}} = 0.45$ | 2.27                          |
| PbSe-BA film                         | 45             | $\sigma_s = 3.8$                          | 4.698                         |

**Figure S5.** TEM images of the superlattices of the OA-capped PbSe QD film (a) before and (b) after exposure to air for 2 days; scale: 100 nm. The sample was prepared through spin-coating of a solution of PbSe QD ( $50 \text{ mg mL}^{-1}$ ) in octane in a  $\text{N}_2$ -filled glove box.

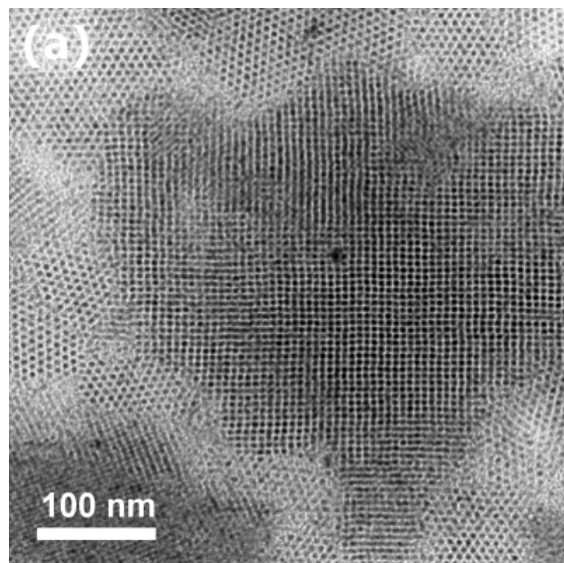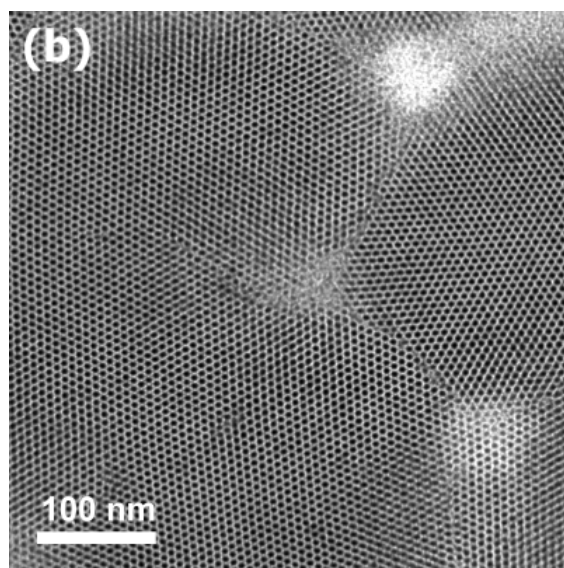

Supplement: c0jm04417b.pdf [file c0jm04417b.pdf]
